# Supplementary material for: In Situ Gene Expression in Native Cryofixed Bone Tissue
Source: MDPI journal article supplement (doi:10.3390/biomedicines10020484), 2022-02-18
Supplement: s1 [file s1]

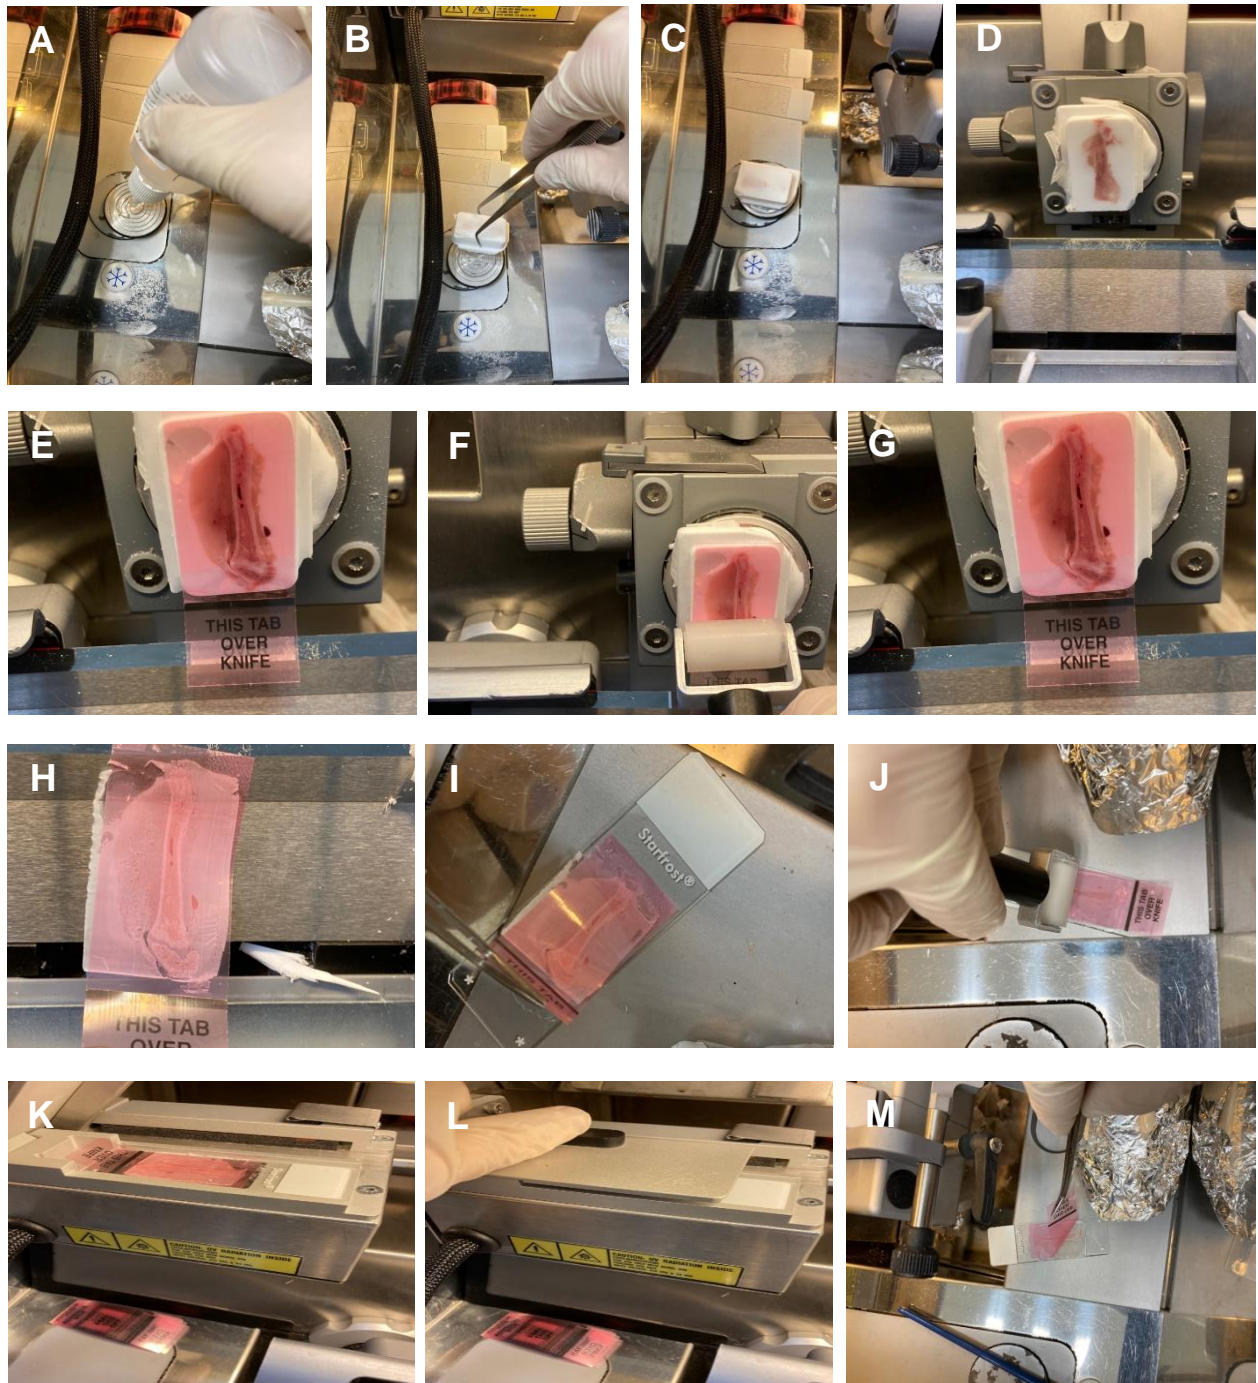

**Figure S1.** Workflow of cryo-sample preparation. (A) Covering mandrel with cryomount solution. (B) Positioning the block on the mandrel. (C) Hardening of the cryomount and fixation of the sample on the mandrel. (D) Trimming of the sample. (E) Positioning of the adhesive film on the surface of the block. (F) Application of the roller to improve the adhesion of the film. (G) Cutting the sample slowly and uninterruptedly by holding the lower part of the adhesive film. (H) Obtaining of 5  $\mu\text{m}$  tissue section on adhesive film. (I) Positioning the adhesive film on the precoated slide. (J) Application of the roller to improve the adhesion to the slide. (K) Positioning the slide in CryoJane flash unit. (L) Triggering two flashes at 30 seconds intervals. (M) Removing the film with cold tool.
