# Supplementary material for: In Situ Gene Expression in Native Cryofixed Bone Tissue
Source: MDPI journal article supplement (doi:10.3390/biomedicines10020484), 2022-02-18
Supplement: s1 [file s1]

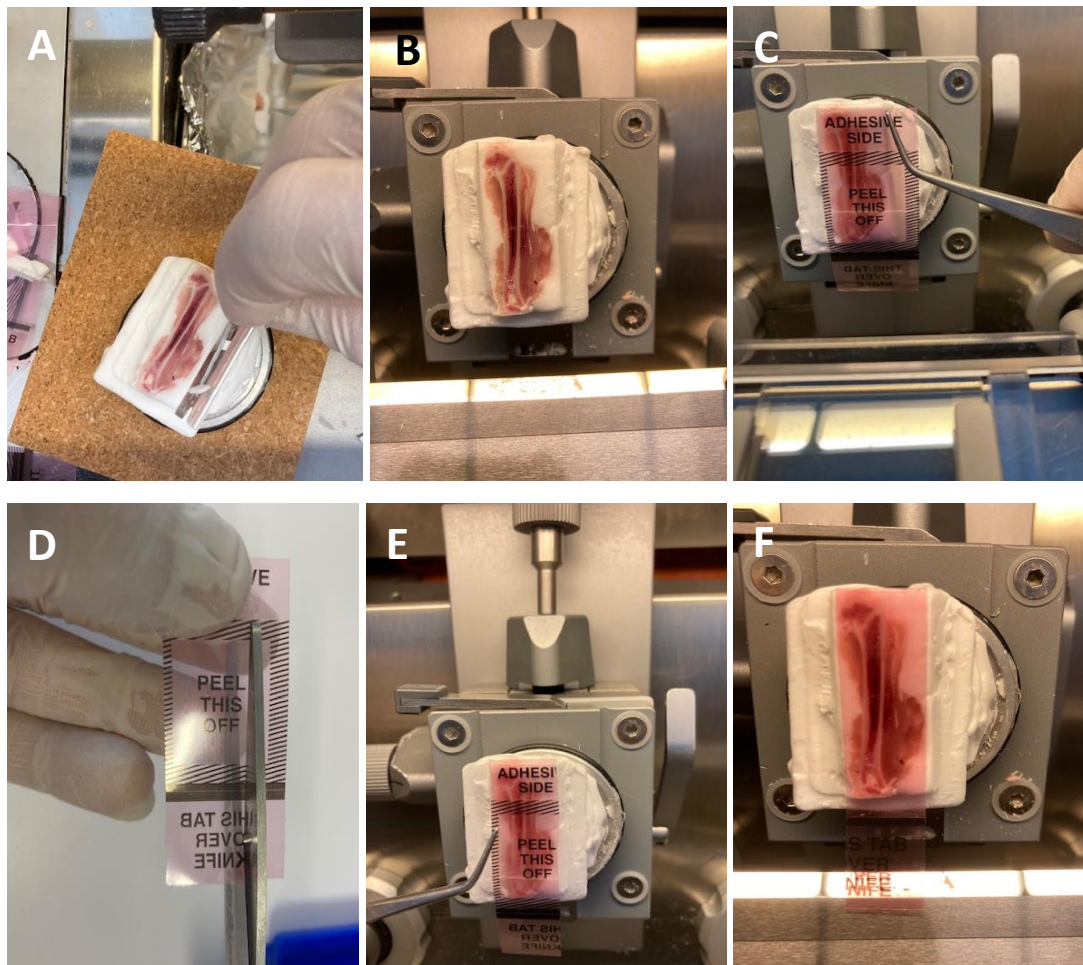

**Figure S2.** Workflow to optimize the transfer of the cryo-section. **(A)** Block trimming to adjust to the sample surface. **(B)** Positioning the block on the mandrel. **(C)** Estimation of the adhesive film surface. **(D)** Cutting of the adhesive film. **(E)** Positioning of the adhesive film on the surface of the block. **(F)** Adhesion of the film on the surface of the sample.
