# Supplementary material for: In Situ Gene Expression in Native Cryofixed Bone Tissue
Source: MDPI journal article supplement (doi:10.3390/biomedicines10020484), 2022-02-18
Supplement: s1 [file s1]

## A

### Rat (*Ratus norvegicus*) $\beta$ -actin cDNA sequence and (T3 / T7) promoters

5' -

GCTACTTGCTGAATTAACCCTCACTAAAGGGAccattgaacacggcattgtcaccaactgggacgata  
 tggagaagatttggcaccacactttctacaatgagctgctgtggccctgaggagcaccctgtgctg  
 ctacccgaggccccctctgaaccctaaggccaaccgtgaaaagatgaccagatcatgtttgagacctt  
 caacaccccagccatgtacgtagccatccaggctgtgttgtccctgtatgcctctggctcgtaccactg  
 gcattgtgatggactccggagacggggtcacccacactgtgcccacatctatgagggttacgcgctccct  
 catgccatcctgctgtgacactggctggcgggacctgacagactacctcatgaagatcctgaccga  
 gctgtgctacagcttcaccaccacagctgagagggaaatcgtgctgacattaaagagaagctgtgct  
 atgttgccctagacttcgagcaagagatggccactgccgcacacctcttccctcctggagaagagctat  
 gagctgctgacgggtcaggtcatcactatcggaatgagcgggtccgatgccccgaggctctcttcca  
 gccttccctcctgggtatggaatcctgtggcatccatgaaactacattcaattccatcatgaagtgtg  
 acgttgacatccgtaaagacctctatgccaacacagtgtgtgtgtgtggcaccaccatgtaccaggc  
 attgctgacaggatgcagaaggagattactgccttggtcctagcaccatgaagatcaagatcattgc  
 tccctcctgagcgcaagtactctgtgtggattggtggctctatcctggcctcactgtccaccttccagc  
 agatgtggatcagcaagcaggagtagcatgagtcggccctccatcgtgcaccgcaaagcttcttag  
 gcggactgttactgagctgcgtttCCCTATAGTGAGTCGTATTACATTTCGACT-3'

## B

| Oligo name                            | Gene accession number | Oligo sequence                                                                                                                               |
|---------------------------------------|-----------------------|----------------------------------------------------------------------------------------------------------------------------------------------|
| DIG_Rat_actin_FW_T3                   | NM_031144.3           | TGAATTAACCCTCACTAAAGGGACCATTGAACACGGCATTGTC                                                                                                  |
| DIG_Rat_actin_RV_T7                   | NM_031144.3           | TGTAATACGACTCACTATAGGGCAAACGCAGCTCAGTAACAGTCC                                                                                                |
| N <sub>(11)</sub> -T3_promoter_primer |                       | GCTACTTGCTGAATTAACCCTCACTAAAGGGA                                                                                                             |
| N <sub>(9)</sub> -T7_promoter_primer  |                       | AGTCGAATGTAATACGACTCACTATAGGG                                                                                                                |
| HCR_rat_actin_b_revcom_fragment1      | NM_031144.3           | CTCACTCCCAATCTCTATCTACCCTACAAATCCAATAAAAAACCCAT<br>ACCCACCATCACACCCTGGTGCCTAGGGCGGCCACGATGGAGG<br>ATTTCACTTCATATCACTCACTCCCAATCTCTATCTACCC   |
| HCR_rat_actin_b_revcom_fragment2      | NM_031144.3           | CTCACTCCCAATCTCTATCTACCCTACAAATCCAATAAAAAATTGAA<br>GGTCTCAAACATGATCTGGGTCATCTTTTCACGGTTGGCCTTAGGA<br>TTTTCATTCATATCACTCACTCCCAATCTCTATCTACCC |
| HCR_rat_actin_b_revcom_fragment3      | NM_031144.3           | CTCACTCCCAATCTCTATCTACCCTACAAATCCAATAAAAAAGTTTCA<br>TGGATGCCACAGGATTCCATACCCAGGAAGGAAGGCTGGAAGAG<br>ATTTCACTTCATATCACTCACTCCCAATCTCTATCTACCC |
| HCR_rat_actin_b_revcom_fragment4      | NM_031144.3           | CTCACTCCCAATCTCTATCTACCCTACAAATCCAATAAAAAACTTGC<br>GCTCAGGAGGAGCAATGATCTTGATCTTCATGGTGCTAGGAGCCA<br>TTTTCATTCATATCACTCACTCCCAATCTCTATCTACCC  |
| HCR_rat_actin_b_revcom_fragment5      | NM_031144.3           | CTCACTCCCAATCTCTATCTACCCTACAAATCCAATAAAAAATCGTA<br>CTCCTGCTTGCTGATCCACATCTGCTGGAAGGTGGACAGTGAGGA<br>TTTTCATTCATATCACTCACTCCCAATCTCTATCTACCC  |

**Table S1.** Schematic representation of the  $\beta$ -actin *in vitro* transcription. **(A)** Rat  $\beta$ -actin cDNA sequence (944bp) in black linked to sequences (in red) containing T3 and T7 promoters in 5' and 3', respectively (framed). **(B)** Oligos used for *in situ* hybridization experiments. T3 (T3 promoter), T7 (T7 promoter), FW (forward primer), RV (reverse primer).
